# Supplementary material
Source: ML conference proceedings conference paper supplement (https://openaccess.thecvf.com/content/ICCV2023/html/Chan_ReLeaPS__Reinforcement_ICCV_2023_paper.html)
Supplement: Supplementary file 3 [file Chan_ReLeaPS__Reinforcement_ICCV_2023_supplemental.zip]

Archive with 4 entries (4 files):
- 01240-supp.pdf
- __MACOSX/._01240-supp.pdf
- 01240-supp-video.mov
- __MACOSX/._01240-supp-video.mov
